# Supplementary material for: A deeper insight into an intriguing acetonitrile–water binary mixture: synergistic effect, dynamic Stokes shift, fluorescence correlation spectroscopy, and NMR studies
Source: Royal Society of Chemistry journal article supplement (doi:10.1039/c6cp05024g), 2016-01-01

**A deeper insight to an intriguing acetonitrile-water binary mixture:  
synergistic effect, dynamics stokes shift, fluorescence correlation  
spectroscopy and NMR studies.**

Somnath Koley and Subhadip Ghosh\*

*School of Chemical Sciences, National Institute of Science Education and Research, HBNI,  
Bhubaneswar 751005, India*

| Contents             | Page No. |
|----------------------|----------|
| Experimental Section | S2-S3    |
| Figures              | S4-S9    |

## 1. Experimental section:

**1.1 Materials and method:** *Coumarin 343 (C343)*, *4-(dicyanomethylene)-2-methyl-6-(4-dimethylaminostyryl)-4H-pyran (DCM)*, *Rhodamine-6G (R6G)*, *acetonitrile* and *isopropanol* were purchased from Sigma-Aldrich and used without further purification. *4-aminophthalimide (4-AP)* was received from Kodak and recrystallized from *methanol-water* mixture. *Hydrochloric acid* and *sodium hydroxide* were purchased from *Spectrochem* and were used for the preparation of acidic and basic solutions of *ACN-WT* mixture for the *TRANES* study. *NMR solvents, acetonitrile-d<sub>3</sub>* and *deuterium oxide (D<sub>2</sub>O)* were purchased from *Acros Organics*. All the experiments were carried out in room temperature (298K). The dye solutions were allowed to stabilize for several hours to ensure complete dissolution prior to any optical measurement.

**1.2 Instruments used:** Steady state absorption and emission spectra were recorded by using *Perkin-Elmer Lambda-750* spectrophotometer and *Perkin-Elmer LS55* spectrofluorometer, respectively. We used 0.5 nm/0.5 nm (excitation /emission) slits to obtain highly accurate emission peak positions from the dye molecules. Similar low slit widths were used for absorption spectra measurements. We took average of absorption peak positions obtained from four sets of measurements for a same sample (same dye within a same composition of binary mixture). These four sets of same samples were prepared separately. We observed absorption peaks (and emission peaks) from all these four sets appear within  $\pm 0.5$  nm range from the average absorption peak (emission peak) position. Fluorescence lifetimes were measured by using time correlated single photon counting (TCSPC) setup (Edinburgh, OB920) with an instrumental response function of  $\sim 70$  ps. Lifetimes were fitted by reconvoluting with excitation lamp profile. Excitation lamp profile was collected using the scattering from Ludox solution. All lifetime measurements were performed at magic angle.

$^1\text{H}$  NMR spectra were recorded in Bruker AV-400 spectrometer. The chemical shift data reported are downfielded with respect to tetramethyl silane (TMS).

### **Fluorescence correlation spectroscopy (FCS) measurement:**

*FCS* studies were carried out by using a confocal microscope (*Zeiss LSM780*). Pinhole diameter was kept fixed at 40  $\mu\text{m}$  and excitation wavelengths were chosen 458 nm for *DCM* and 488 nm for *R6G*, respectively. Calibration of the excitation volume was done by using a sample (*R6G* in water) whose diffusion coefficient is reported ( $D_t=426\mu\text{m}^2/\text{sec}$ ).<sup>1</sup> Transverse

radius ( $\omega_{xy}$ ) of the excitation volume was calculated using the relation,  $\omega_{xy} = \sqrt{(4\tau_D D_t)}$ ; where  $D_t$  is known ( $\sim 426 \mu\text{m}^2/\text{sec}$  for R6G in WT) and  $\tau_D$  (diffusion time) was obtained from the fitting of autocorrelation curve (of R6G in WT) using equation S1. We obtained  $\omega_{xy} \sim 278$  nm for our setup. The effective excitation volume was determined using the equation  $V_{eff} = \pi^{3/2} k (\omega_{xy})^3$ ; where k [ $k = (\omega_z / \omega_{xy}) = 5$ ] is the structure parameter and  $\omega_z$  is the axial radius of the excitation volume.<sup>2</sup> The calculated value of the excitation volume was found to be  $\sim 0.6$  femto litre. We fitted the normalized auto-correlation curves of dye molecules in ACN-WT mixture by using the following equation (equation S1).<sup>1-2</sup>

$$G(\tau) = (1 - T + T \exp^{-\tau/\tau_{triplet}}) \left( \frac{1}{1 + \tau / \tau_D} \right) \left( \frac{1}{1 + (\tau / k^2 \tau_D)} \right)^{1/2} \quad (\text{S1})$$

Where,  $T$  is the fraction of molecules in triplet state and  $\tau_{triplet}$  is the corresponding lifetime in triplet state.  $\tau_D$  is the diffusion time of the fluorescent dye molecule along the transverse direction. We obtained numerical value of  $\tau_D$  from the fitting of autocorrelation curve. Using the known values of  $\tau_D$  and  $\omega_{xy}$ , one can easily get the value of translational diffusion coefficient ( $D_t$ ) of the fluorescent dye molecule using the following equation.

$$\tau_D = \frac{\omega_{XY}^2}{4D_t} \quad (\text{S2})$$

## References

1. Z. Petrasek and P. Schwille, *Biophys. J.*, 2008, **94**, 1437-1448.
2. S. Ghosh, U. Mandal and A. Adhikari, *Chem. Asian. J.*, 2009, **4**, 948-954.

Figure S1. Plot of *Onsager polarity function*  $F(\epsilon) [= 2(\epsilon-1)/2\epsilon+1]$  as function of mole fraction of water in the *ACN-WT* binary mixture.

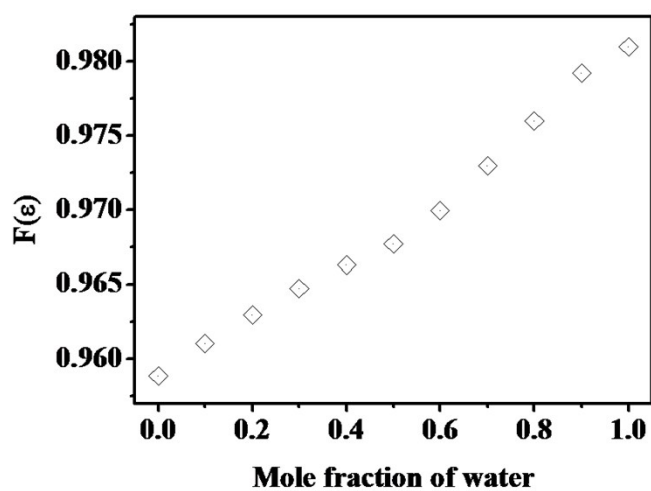

Figure S2. Time resolved emission spectra (*TRES*) of (A) *DCM*, (B) *4-AP* and (C) *C343* in *ACN-WT* binary mixture ( $X_{WT}=0.51$ ) at time 0 ps, 200 ps, 500 ps, 1200 ps, respectively.

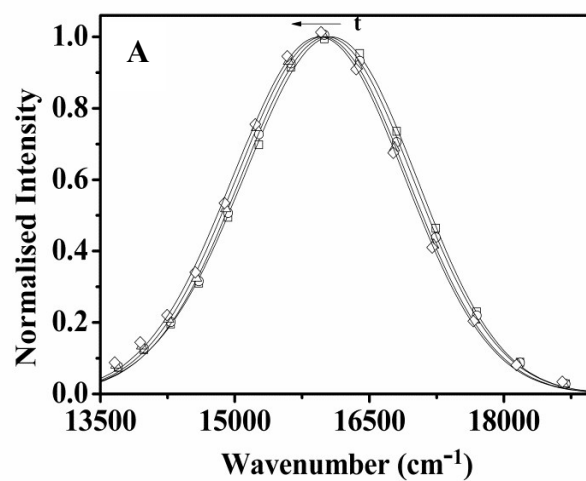

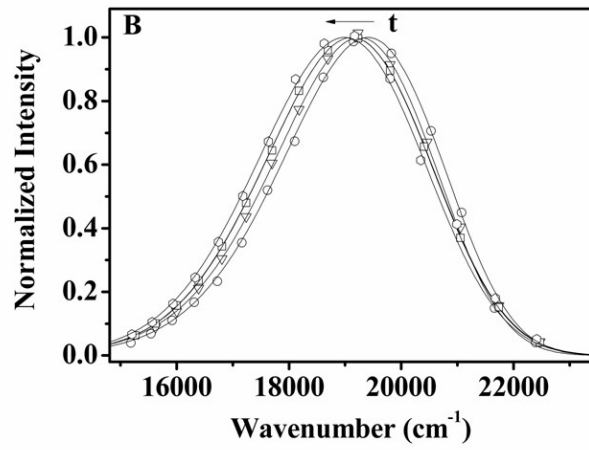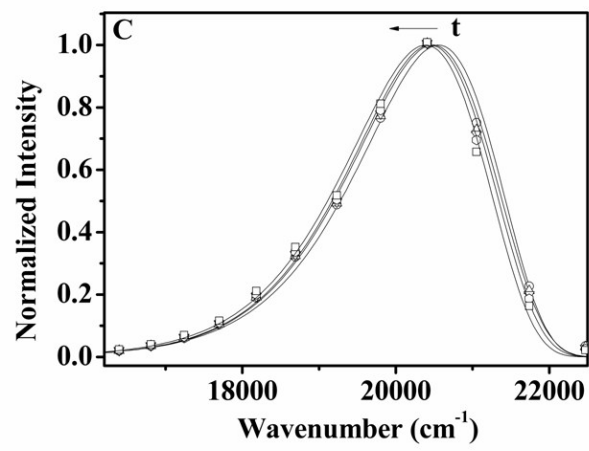

Figure S3. *TRANES* of C343 in (A) acidic (1 N HCl) ACN-WT binary mixture, (B) basic (5mM NaOH) ACN-WT binary mixture and (C) in isopropanol. No isoemissive point is detected in any of the following cases.

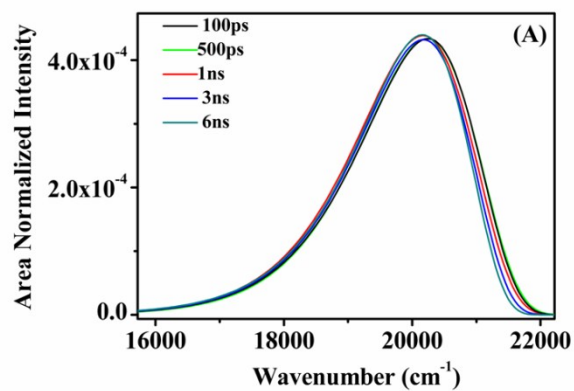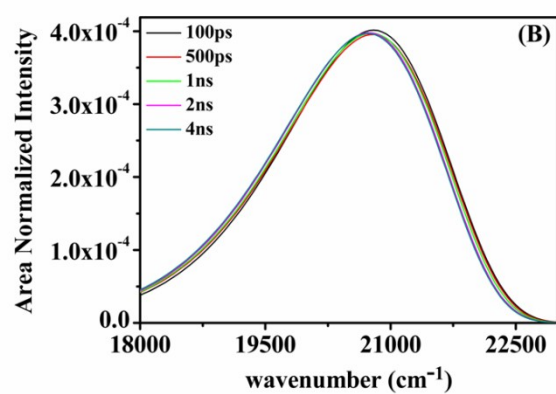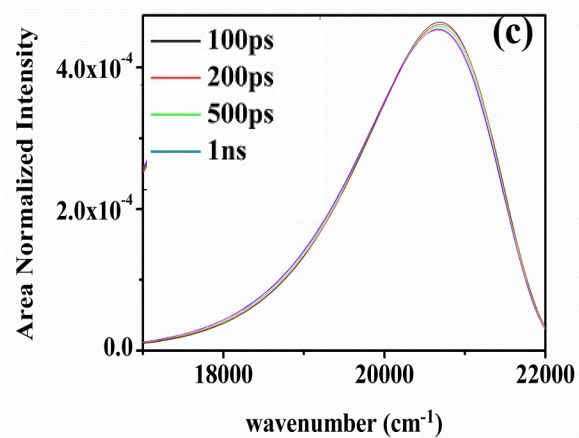

Figure S4. Decay of solvent correlation function for *C343* in *ACN-WT* binary mixture in (A) basic condition (*5 mM NaOH*) and (B) Acidic condition (*1N HCl*).

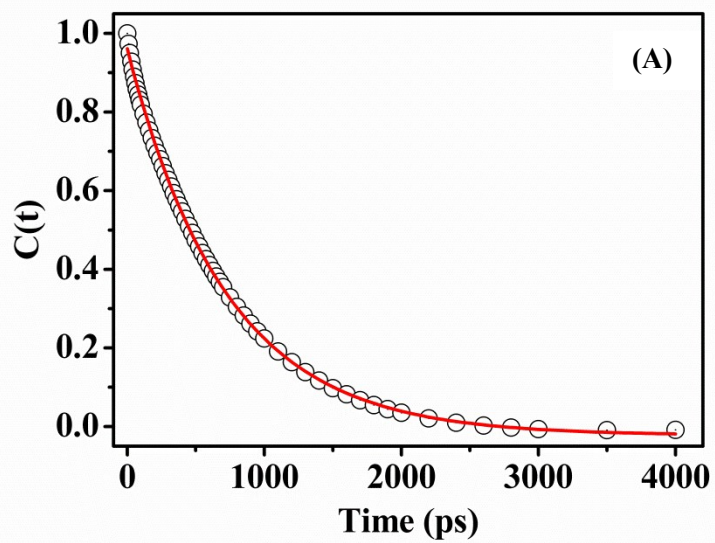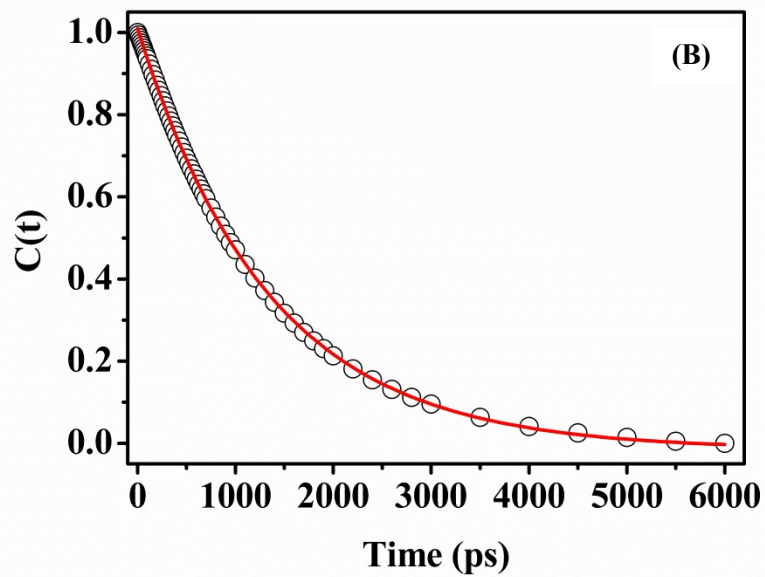

Figure S5. (A) Autocorrelation curve of *R6G* with fitted line (red line) in *ACN-WT* binary ( $X_{WT} = 0.51$ ) mixture for a particular *X-Y-Z* position inside the sample. (B) Few fitting curves of autocorrelation functions of *R6G* in *ACN-WT* ( $X_{WT} = 0.51$ ) binary mixture as obtained from different *X-Y-Z* positions inside the sample.

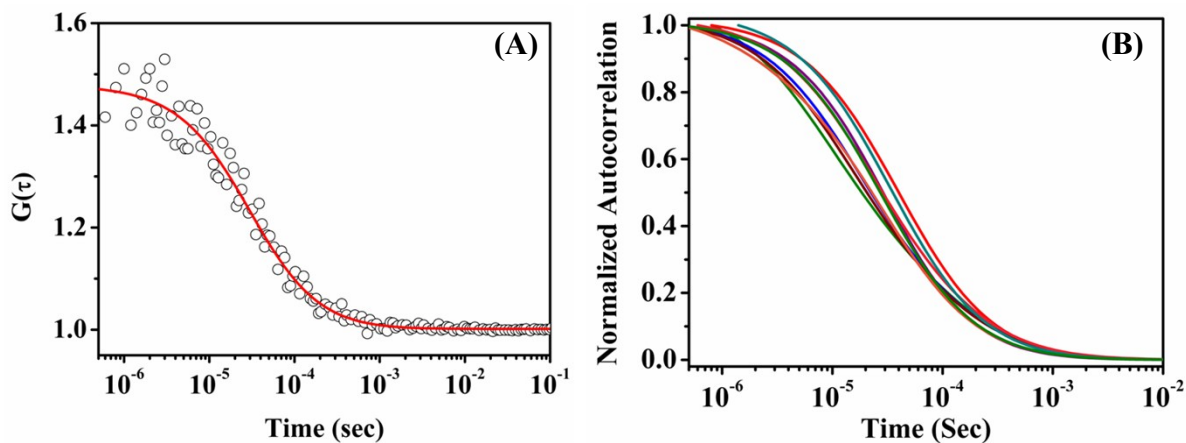

Figure S6. (A) Chemical shift data for the *O-H* proton of water and (B) Chemical shift data for the *C-H* proton of acetonitrile in the binary mixture at different compositions.

(A)

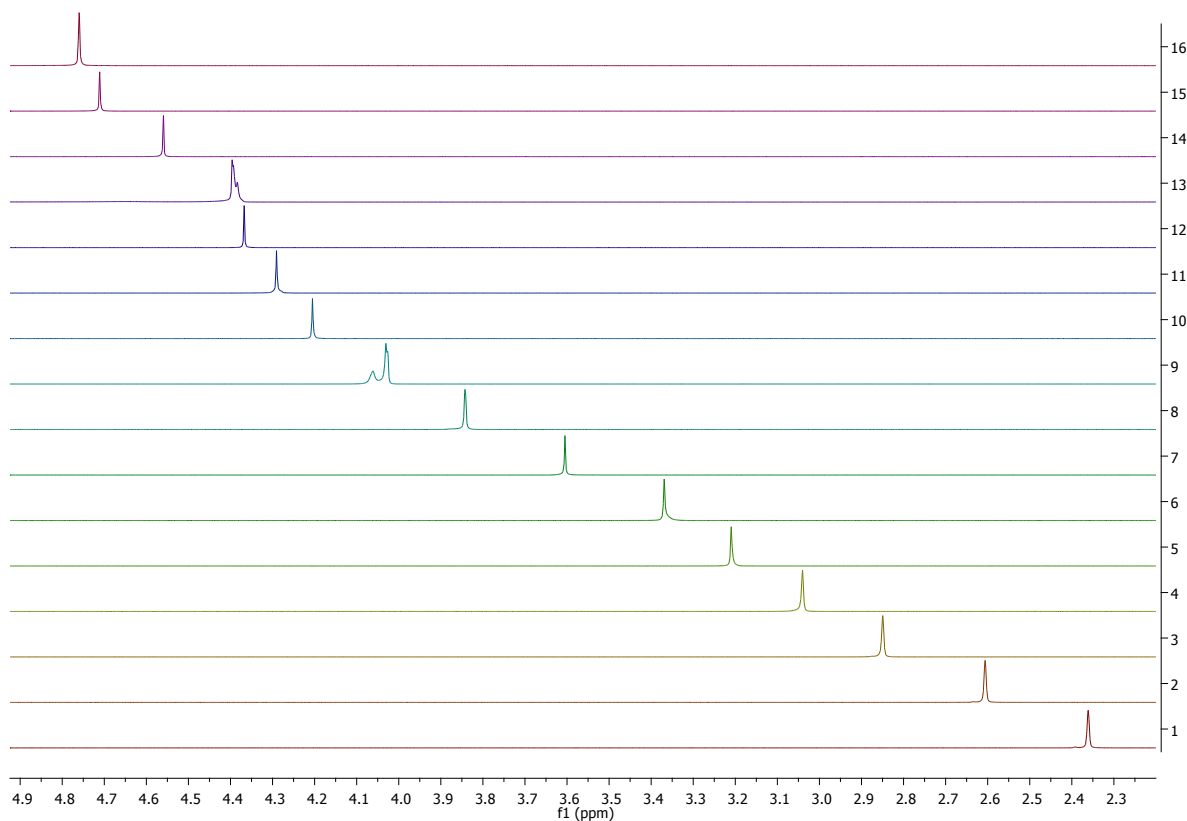



(B)

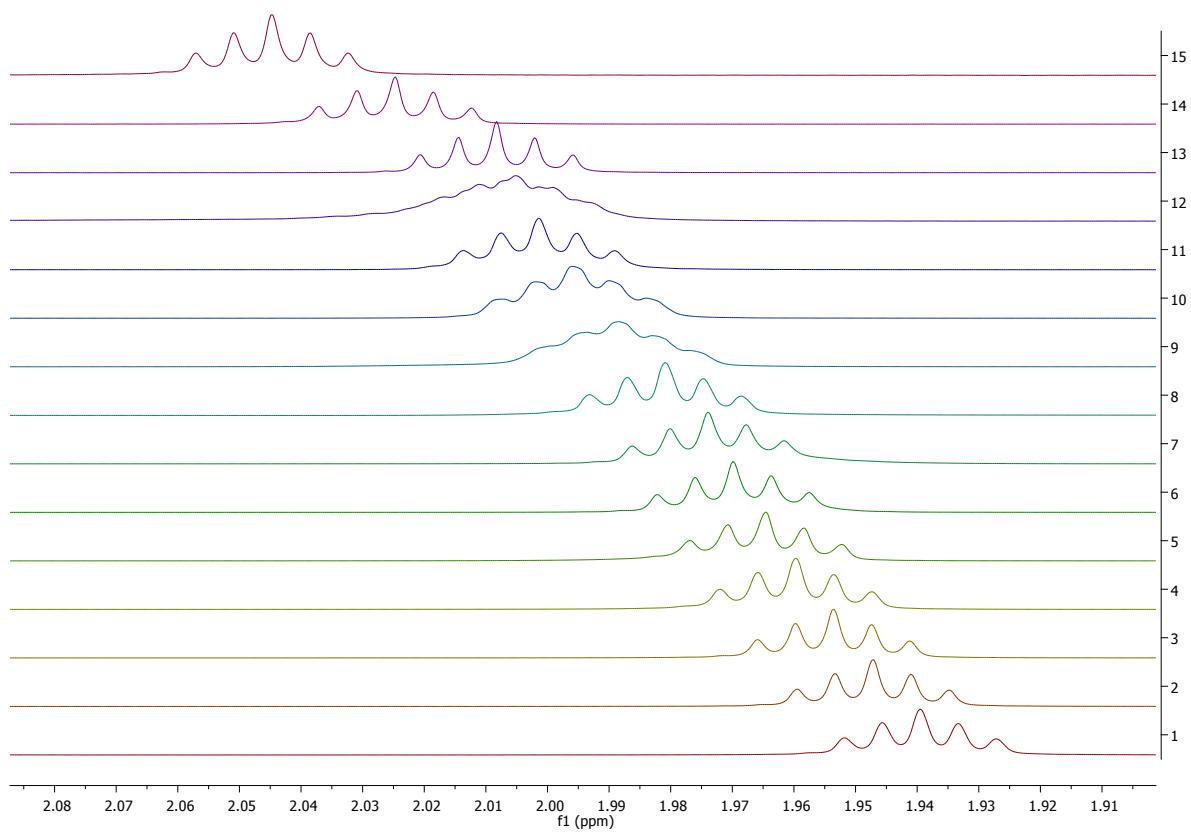

Supplement: c6cp05024g1.pdf [file c6cp05024g1.pdf]
